## Potential structural role of non-coding and coding RNAs in the organization of the cytoskeleton at the vegetal cortex of *Xenopus* oocytes

Malgorzata Kloc, Katarzyna Wilk, Diana Vargas, Yuri Shirato, Szczepan Bilinski and Laurence D. Etkin *Development* **132**, 3445-3457.

In Figure 2 of this paper, panel A1 and panel B2 were inadvertently duplicated. Panel A1 has been replaced with the correct panel in the figure reprinted below. There are no changes to the original figure legend, which is accurate. This error in no way effects the conclusions of the study.

The authors apologise to readers for this mistake.

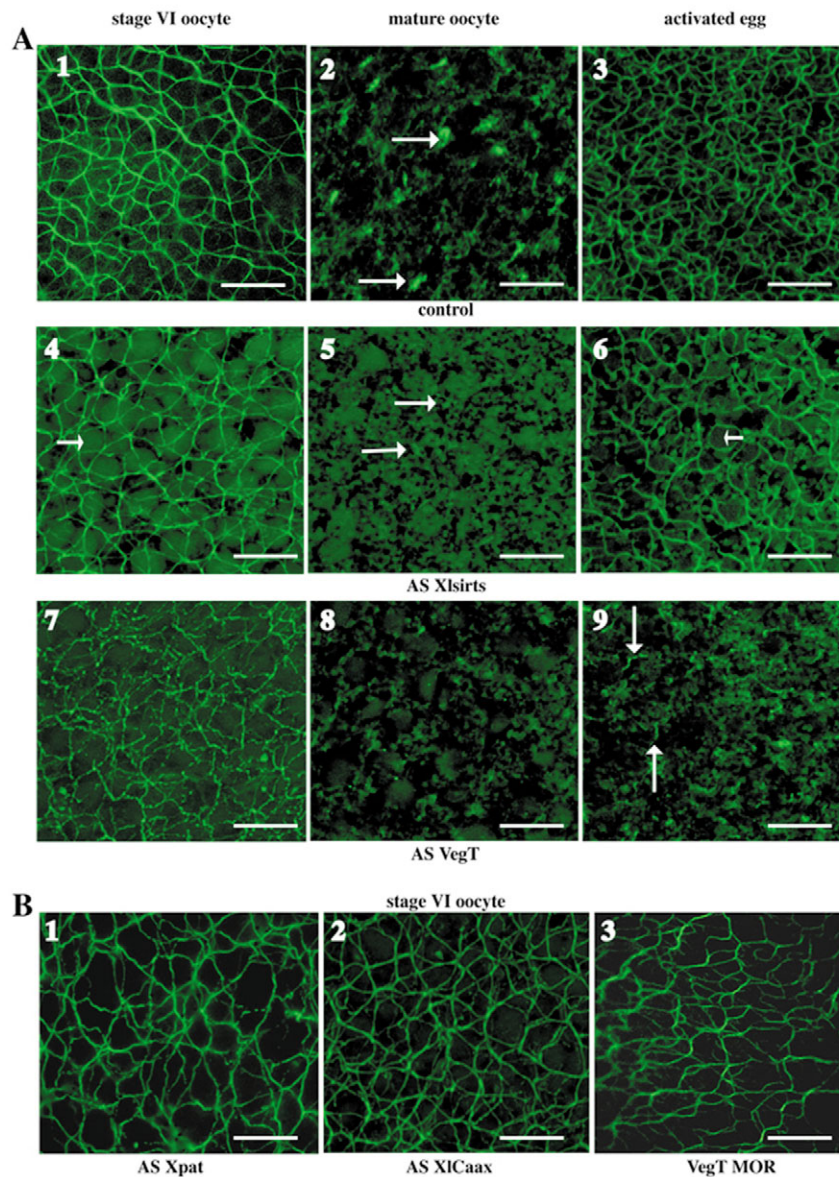

Source: https://cob.silverchair.com/dev/article-pdf/132/24/5613/1468984/5613.pdf
